# Supplementary material for: Sphingosine kinase 1 is a potential therapeutic target for nasopharyngeal carcinoma
Source: PubMed Central journal article supplement (PMC5348343; doi:10.18632/oncotarget.13014), 2016-11-02
Supplement: oncotarget-07-80586-s001.pdf [file oncotarget-07-80586-s001.pdf]

## Sphingosine kinase 1 is a potential therapeutic target for nasopharyngeal carcinoma

### Supplementary Materials

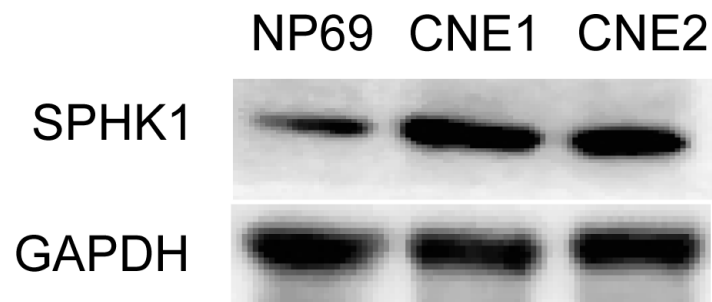

Supplementary Figure S1: Western blot analysis of the expression of SPHK1 in NP69 immortalized normal human nasopharyngeal epithelial cells and NPC cell lines; GAPDH was used as a loading control.
